# Supplementary material for: A base-modified PNA–graphene oxide platform as a turn-on fluorescence sensor for the detection of human telomeric repeats
Source: Royal Society of Chemistry journal article supplement (doi:10.1039/c4nr00878b), 2014-05-26
Supplement: c4nr00878b1.pdf [file c4nr00878b1.pdf]

# Base-Modified PNA-Graphene Oxide Platform as a Turn-On Fluorescence Sensor for the Detection of Human Telomeric Repeats

Pramod M. Sabale, Jerrin Thomas George, Seergazhi G. Srivatsan\*

Department of Chemistry, Indian Institute of Science Education and Research, Dr. Homi Bhabha Road, Pashan, Pune 411008, India

## Electronic Supplementary Information

| Contents                                                                                                                                                                      | Page # |
|-------------------------------------------------------------------------------------------------------------------------------------------------------------------------------|--------|
| <b>1. Materials</b>                                                                                                                                                           | S2     |
| <b>2. Instrumentation</b>                                                                                                                                                     | S2     |
| <b>3. MALDI-TOF mass measurements</b>                                                                                                                                         | S3     |
| Fig. S1 (A) RP-HPLC chromatogram and (B) mass spectrum of PNA oligomer <b>7</b>                                                                                               | S3     |
| Fig. S2 (A) RP-HPLC chromatogram and (B) mass spectrum of PNA oligomer <b>14</b>                                                                                              | S3     |
| Table S1 $\epsilon_{260}$ and MALDI-TOF mass analysis of PNA oligomers                                                                                                        | S4     |
| <b>4. Quantum yield determination of PNA monomer <b>5</b> in various solvents</b>                                                                                             | S4     |
| Fig. S3 Excited state decay profile of PNA monomer <b>5</b> in solvents of different polarity                                                                                 | S4     |
| Fig. S4 Plot of Stokes shift versus $E_T(30)$ for PNA monomer <b>5</b> .                                                                                                      | S5     |
| Fig. S5 Fluorescence spectra of modified PNA oligomer <b>7</b> and corresponding duplexes                                                                                     | S5     |
| Table S2 Emission maximum of PNA <b>7</b> and duplexes made of <b>7</b>                                                                                                       | S5     |
| Table S3 $T_m$ values of control and modified PNA-DNA and DNA-DNA duplexes                                                                                                    | S6     |
| Fig. S6 (A) UV-thermal melting analysis and (B) CD spectra of control unmodified <b>13•15</b> and fluorescently modified <b>14•15</b> duplexes                                | S6     |
| Fig. S7 UV-vis absorption spectrum of GO dispersion in water                                                                                                                  | S6     |
| Table S4 Emission maximum of PNA probe <b>14</b> , PNA-GO complex ( <b>14</b> -GO) and PNA-GO complex in the presence of telomere target <b>15</b> and control DNA <b>8</b> . | S7     |
| Fig. S8 A plot of normalized fluorescence intensity at $\lambda_{em} = 422$ nm versus increasing concentration of telomere DNA <b>17</b> .                                    | S7     |
| <b>5. NMR Spectra</b>                                                                                                                                                         | S8     |
| <b>6. Reference</b>                                                                                                                                                           | S12    |

## 1. Materials

Di-*tert*-butyl dicarbonate, ethylenediamine, ethyl bromoacetate, TFA, chloroacetyl chloride and sodium nitrate were purchased from Spectrochem. Sulphuric acid, hydrochloric acid, hydrogen peroxide and KMnO<sub>4</sub> were purchased from Rankem India. Barium chloride was purchased from Merck, India. 5-Iodouracil, benzo[*b*]furan and *bis*(triphenylphosphine)-palladium (II) chloride, HOBt, HBTU, *N,N*-diisopropylethylamine (DIPEA), 1,2-ethanedithiol, thioanisole, trifluoromethanesulfonic acid (TFMSA), and graphite flakes were obtained from Sigma-Aldrich. Boc-protected *aeg*-PNA monomers were purchased from ASM Research Chemicals. 4-Methylbenzhydrylamine•HCl (MBHA) resin LL (100-200 mesh) was obtained from Novabiochem. DNA oligonucleotides were purchased from Integrated DNA Technologies, Inc. Oligonucleotides were purified by polyacrylamide gel electrophoresis (PAGE) under denaturing conditions and desalted on Sep-Pak Classic C18 cartridges (Waters Corporation). Autoclaved water was used in all biochemical reactions and fluorescence measurements.

## 2. Instrumentation

NMR spectra were recorded on a 400 MHz Jeol ECS-400. All mass measurements were recorded on an Applied Biosystems 4800 Plus MALDI-TOF/TOF analyzer and Water Synapt G2 high definition mass spectrometers. PNA oligomers were purified using Dionex ICS 3000 HPLC. Absorption spectra were recorded on a Shimadzu UV-2600 spectrophotometer. UV-thermal melting analysis of duplexes was performed on a Cary 300Bio UV-Vis spectrophotometer. Steady-state fluorescence experiments were carried out in a micro fluorescence cuvette (Hellma, path length 1.0 cm) on a Fluoromax-4 spectrofluorometer (Horiba Scientific). Time-resolved fluorescence experiments were carried out on a TCSPC instrument (Horiba JobinYvon, Fluorolog 3). All CD spectra were recorded on JASCO J-815 CD spectrometer. Powder X-ray diffraction spectrum of GO was recorded using Bruker D8 Advance X-ray powder diffractometer (Cu K $\alpha$  radiation,  $\lambda = 1.541\text{\AA}$ ). Raman spectra (532 nm excitation) were recorded using LabRAM HR 800 Raman spectrometer (Horiba Scientific).

### 3. MALDI-TOF mass measurements

Molecular weight of PNA oligomers were determined using Applied Biosystems 4800 Plus MALDI-TOF/TOF analyser. 1  $\mu$ L of a  $\sim$ 150  $\mu$ M stock solution of PNA oligomer was combined with 2,5-dihydroxybenzoic acid (DHB) or  $\alpha$ -cyano-4-hydroxycinnamic acid (CHCA) matrix. The samples were spotted on a plate and air dried before mass analysis. For MALDI-TOF mass analysis of PNA oligomers see Table S1.

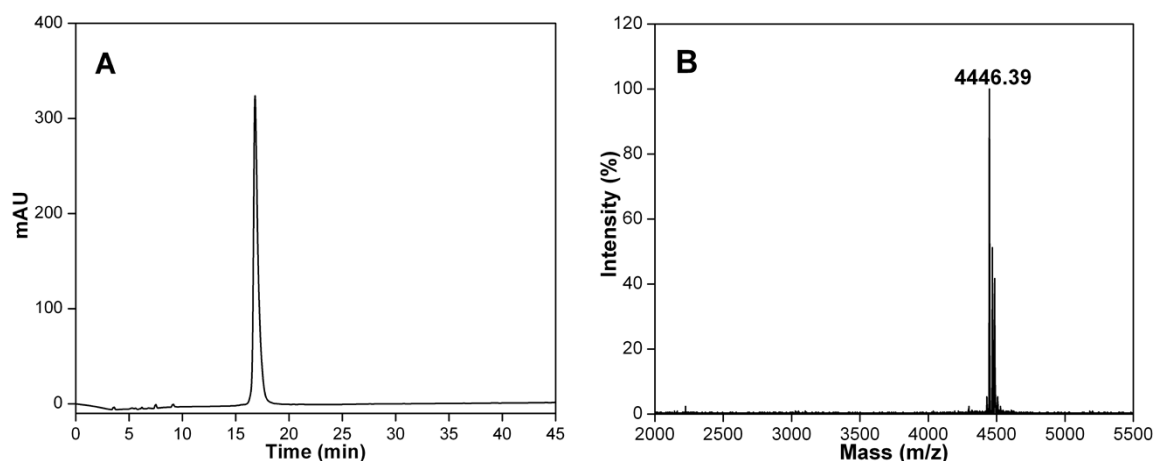

Fig. S1 Representative HPLC and MALDI-TOF mass spectrum of a modified PNA oligomer. (A) RP-HPLC chromatogram of PNA oligomer **7**. Mobile phase A: 5% acetonitrile in  $H_2O$  containing 0.1% TFA. Mobile phase B: 50% acetonitrile in  $H_2O$  containing 0.1% TFA. Flow rate: 3 mL/min. Gradient: 0–50% B in 25 min and 50–100% B in 20 min. (B) MALDI-TOF mass spectrum of PNA oligomer **7**. Calculated for  $[M+H]^+ = 4446.33$  and observed = 4446.39. See Table S1 for mass data.

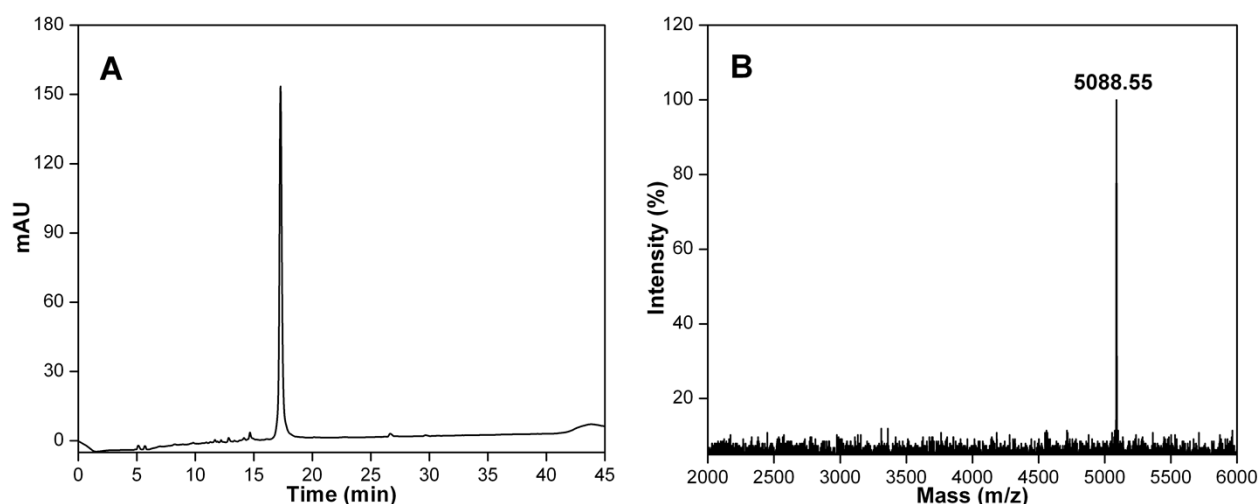

Fig. S2 (A) RP-HPLC chromatogram of PNA telomere probe **14**. Mobile phase A: 5% acetonitrile in  $H_2O$  containing 0.1% TFA, mobile phase B: 50% acetonitrile in  $H_2O$  containing 0.1% TFA. Flow rate: 3 mL/min. Gradient: 0–50% B in 25 min and 50–100% B in 20 min. (B) MALDI-TOF mass spectrum of PNA telomere probe **14**. Calculated for  $[M+H]^+ = 5088.01$  and observed = 5088.55.

Table S1  $\epsilon_{260}$  and MALDI-TOF mass analysis of PNA oligomers

| PNA       | Sequence <sup>a</sup>         | $\epsilon_{260}$ (M <sup>-1</sup> cm <sup>-1</sup> ) | Calculated mass             | Observed mass |
|-----------|-------------------------------|------------------------------------------------------|-----------------------------|---------------|
| <b>6</b>  | CGATCAGTGACTAGCKK             | 15.4 x 10 <sup>4</sup>                               | 4344.24 [M+H] <sup>+</sup>  | 4344.67       |
| <b>7</b>  | CGATCAG <b>5</b> GACTAGCKK    | 15.7 x 10 <sup>4</sup>                               | 4446.33 [M+H] <sup>+</sup>  | 4446.39       |
| <b>13</b> | CCCTAACCCTAACCCTAACK          | 16.7 x 10 <sup>4</sup>                               | 5007.90 [M+Na] <sup>+</sup> | 5007.15       |
| <b>14</b> | CCC <b>5</b> AACCCTAACCCTAACK | 17.1 x 10 <sup>4</sup>                               | 5088.01 [M+H] <sup>+</sup>  | 5088.55       |

<sup>a</sup>PNA sequences are written from N to C terminus.

#### 4. Quantum yield determination of PNA monomer **5** in various solvents

Quantum yield of PNA monomer **5** in different solvents relative to 2-aminopurine standard was determined using the following equation.

$$\Phi_{F(x)} = (A_s/A_x) (F_x/F_s) (n_x/n_s)^2 \Phi_{F(s)}$$

Where s is the standard, x is the PNA monomer, A is the absorbance at excitation wavelength, F is the area under the emission curve,  $n$  is the refractive index of the solvent, and  $\Phi_F$  is the quantum yield.

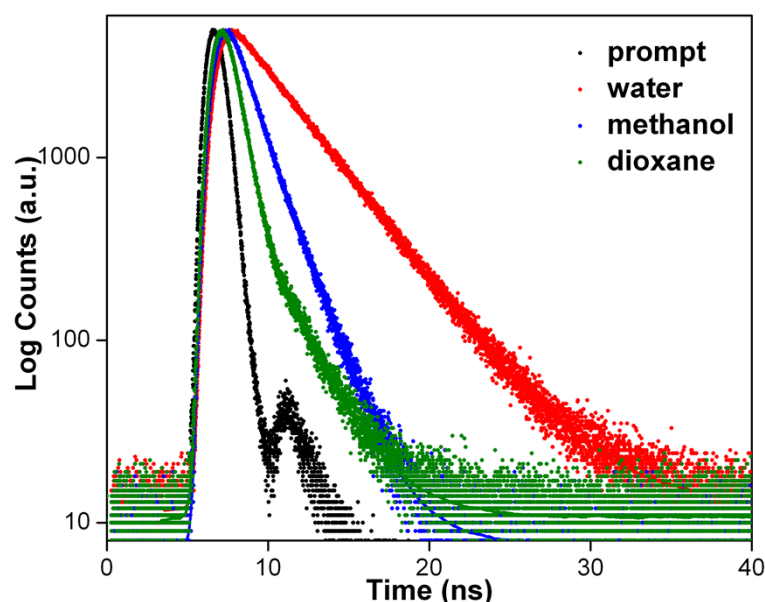

Fig. S3 Excited state decay profile of PNA monomer **5** (5.0  $\mu$ M) in solvents of different polarity. Samples were excited using 320 nm LED source. Laser profile is shown in black (prompt). Curve fits are shown in solid lines.

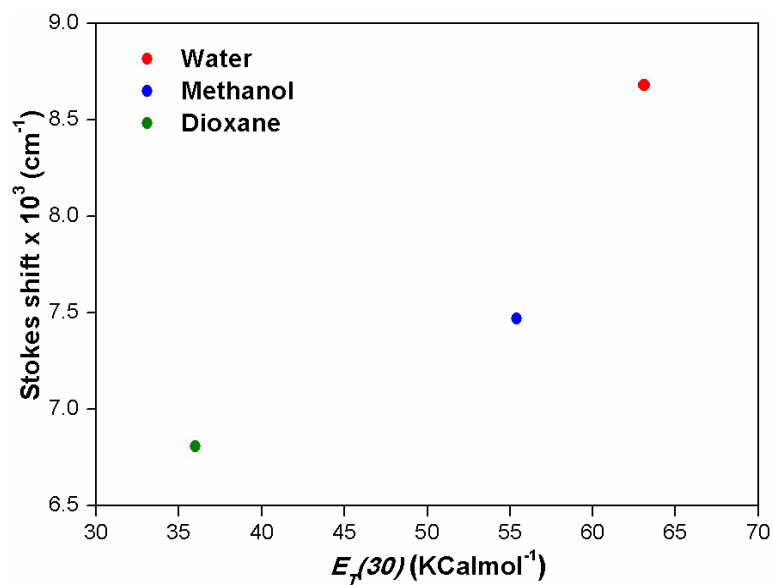

Fig. S4 Plot of Stokes shift versus  $E_T(30)$  (microscopic solvent polarity parameter) for PNA monomer 5.

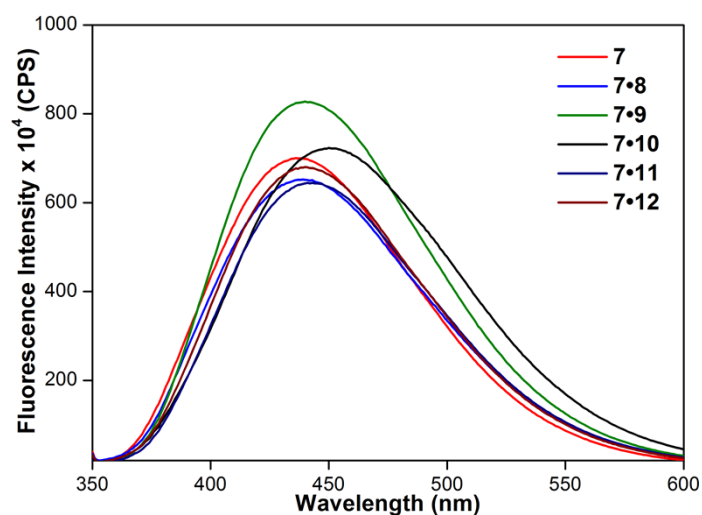

Fig. S5 Fluorescence spectra of modified PNA oligomer 7 (2.0  $\mu\text{M}$ ) and corresponding duplexes (2.0  $\mu\text{M}$ ) in 10 mM phosphate buffer (pH 7.1, 100 mM NaCl, 0.1 mM EDTA). Samples were excited at 330 nm, and excitation and emission slit widths were maintained at 10 nm and 12 nm respectively. For emission maximum of PNA 7 and duplexes made of 7 see Table S2.

Table S2 Emission maximum of PNA 7 and duplexes made of 7

| Sample | $\lambda_{em}$ | $I_{rel}^a$ |
|--------|----------------|-------------|
| 7      | 436            | 1.00        |
| 7•8    | 439            | 0.93        |
| 7•9    | 440            | 1.18        |
| 7•10   | 450            | 1.03        |
| 7•11   | 443            | 0.92        |
| 7•12   | 440            | 0.97        |

<sup>a</sup>Relative emission intensity with respect to ssPNA 7

Table S3  $T_m$  values of control and modified PNA-DNA and DNA-DNA duplexes

| Control<br>unmodified duplex | $T_m$ (°C)     | Fluorescently<br>modified duplex | $T_m$ (°C)     |
|------------------------------|----------------|----------------------------------|----------------|
| <b>6•8</b>                   | $77.0 \pm 0.1$ | <b>7•8</b>                       | $73.3 \pm 0.5$ |
| <b>13•15</b>                 | $71.2 \pm 0.8$ | <b>14•15</b>                     | $71.0 \pm 1.0$ |
| <b>15•18</b>                 | $59.3 \pm 0.9$ |                                  |                |

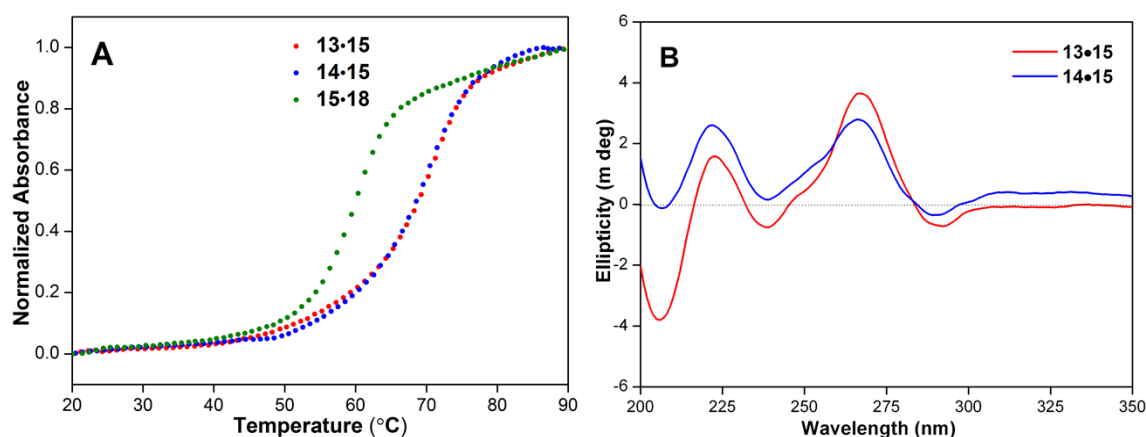

Fig. S6 (A) UV-thermal melting analysis (2.0  $\mu$ M) of control unmodified (**13•15**) and fluorescently modified (**14•15**) PNA-DNA duplexes and corresponding DNA-DNA duplex (**15•18**) in 10 mM phosphate buffer (pH 7.1, 100 mM NaCl, 0.1 mM EDTA). For  $T_m$  values see Table S3. (B) CD spectra (5.0  $\mu$ M) of control unmodified **13•15** and fluorescently modified **14•15** duplexes in 10 mM phosphate buffer (pH 7.1, 100 mM NaCl, 0.1 mM EDTA). A 1:1 mixture of PNA and DNA in the above mentioned buffer was heated at 90 °C for 3 min and cooled slowly to room temperature. The samples were placed on crushed ice bath for at least 1 hr before thermal melting and CD analyses.

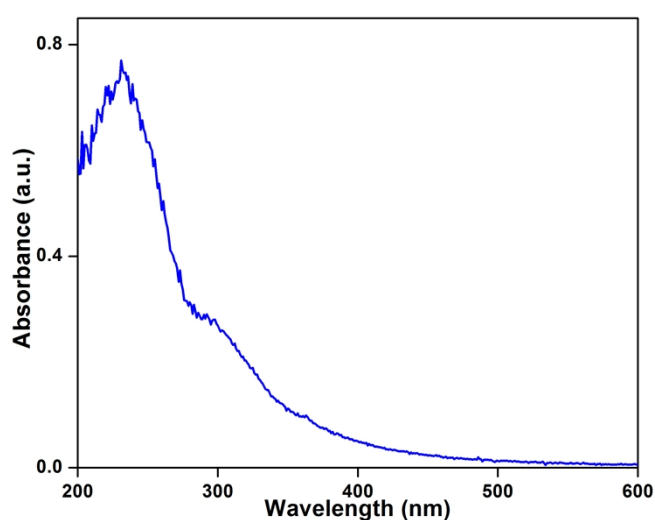

Fig. S7 UV-Vis absorption spectrum of GO dispersion in water. A peak at  $\sim 235$  nm and a shoulder at  $\sim 292$  nm match with the literature report for GO dispersion in water.<sup>S1</sup>

Table S4 Emission maximum of PNA probe **14**, PNA-GO complex (**14**-GO) and PNA-GO complex in the presence of telomere target **15** and control DNA **8**.

| Sample <sup>a</sup>        | $\lambda_{em}$<br>(nm) | $I_{rel}$ <sup>b</sup> |
|----------------------------|------------------------|------------------------|
| <b>14</b>                  | 409                    | 2.8                    |
| <b>14</b> -GO              | 409                    | 1.0                    |
| <b>14</b> -GO + <b>15</b>  | 422                    | 3.7                    |
| <b>14</b> -GO + <b>8</b>   | 406                    | 1.2                    |
| GO + <b>14</b> • <b>15</b> | 422                    | 4.8                    |
| GO + <b>14</b> • <b>8</b>  | 406                    | 1.1                    |
| <b>14</b> • <b>15</b>      | 427                    | 4.9                    |

<sup>a</sup>Duplexes **14**•**15** and **14**•**8** were prepared by heating a mixture of PNA **14** (100 nM) and DNA **15** or **8** (1.0  $\mu$ M) in 10 mM phosphate buffer (pH 7.1, 100 mM NaCl, 0.1 mM EDTA) at 90 °C for 3 min. Samples were cooled to RT slowly and kept on an ice bath for ~60 min. <sup>b</sup>Relative emission intensity with respect to PNA-GO complex.

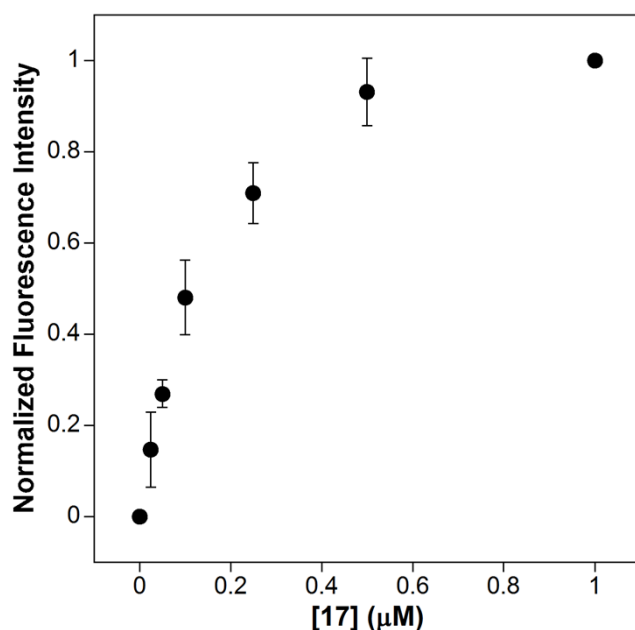

Fig. S8 A plot of normalized fluorescence intensity at  $\lambda_{em} = 422$  nm versus increasing concentration of telomere DNA **17**. Conc. of PNA **14** (50 nM), GO (0.5  $\mu$ g/mL) and DNA **17** (25–1000 nM). Samples were excited at 330 nm and excitation and emission slit widths were kept at 10 nm and 12 nm, respectively. A linear correlation was obtained until 100 nM of DNA **17** ( $y = 4.74x + 0.02$ ,  $R^2 = 0.99$ ). The detection limit was calculated based on three times the signal-to-noise level using the following equation.<sup>S2</sup>

$$\text{Detection limit} = 3\sigma/S$$

Where,  $\sigma$  is the variation in fluorescence intensity of PNA-GO complex in the absence of telomere DNA target and  $S$  is the slope of the linear fit.

## 5. NMR Spectra

$^1\text{H}$ -NMR of compound **2** in  $\text{CDCl}_3$

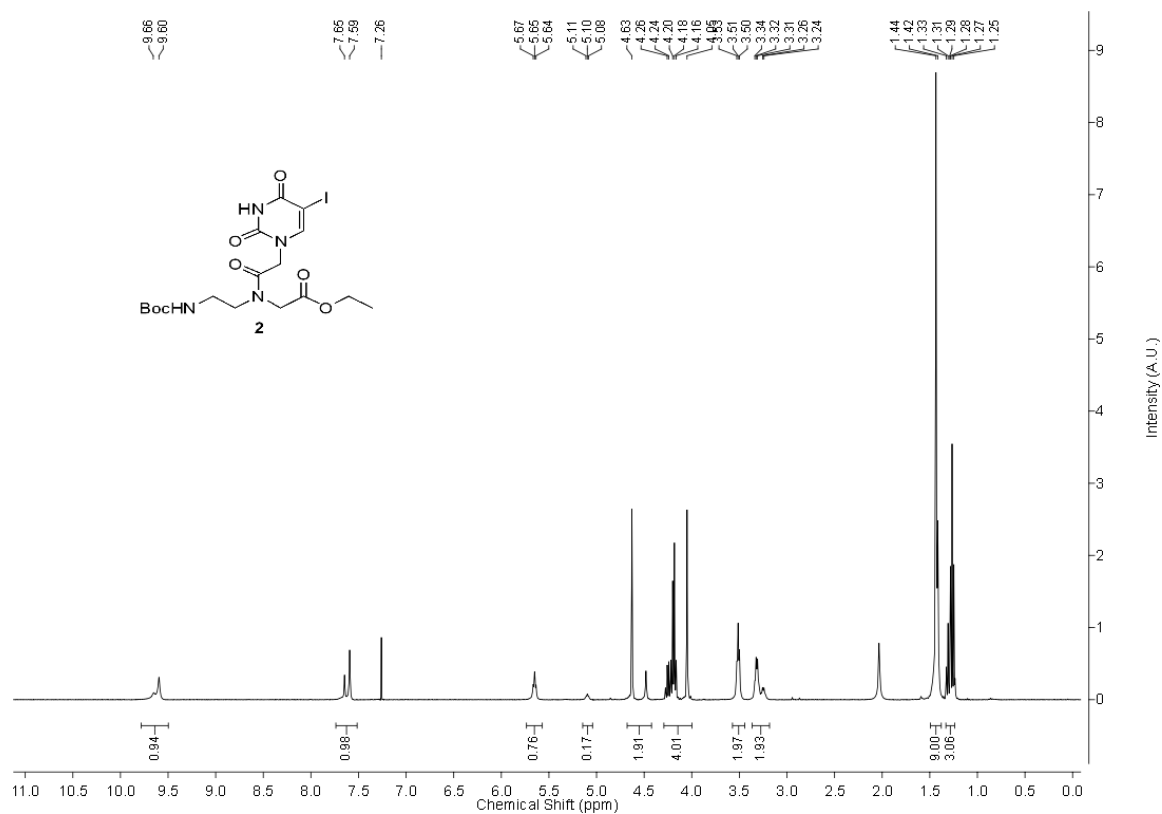

$^{13}\text{C}$ -NMR of compound **2** in  $\text{CDCl}_3$

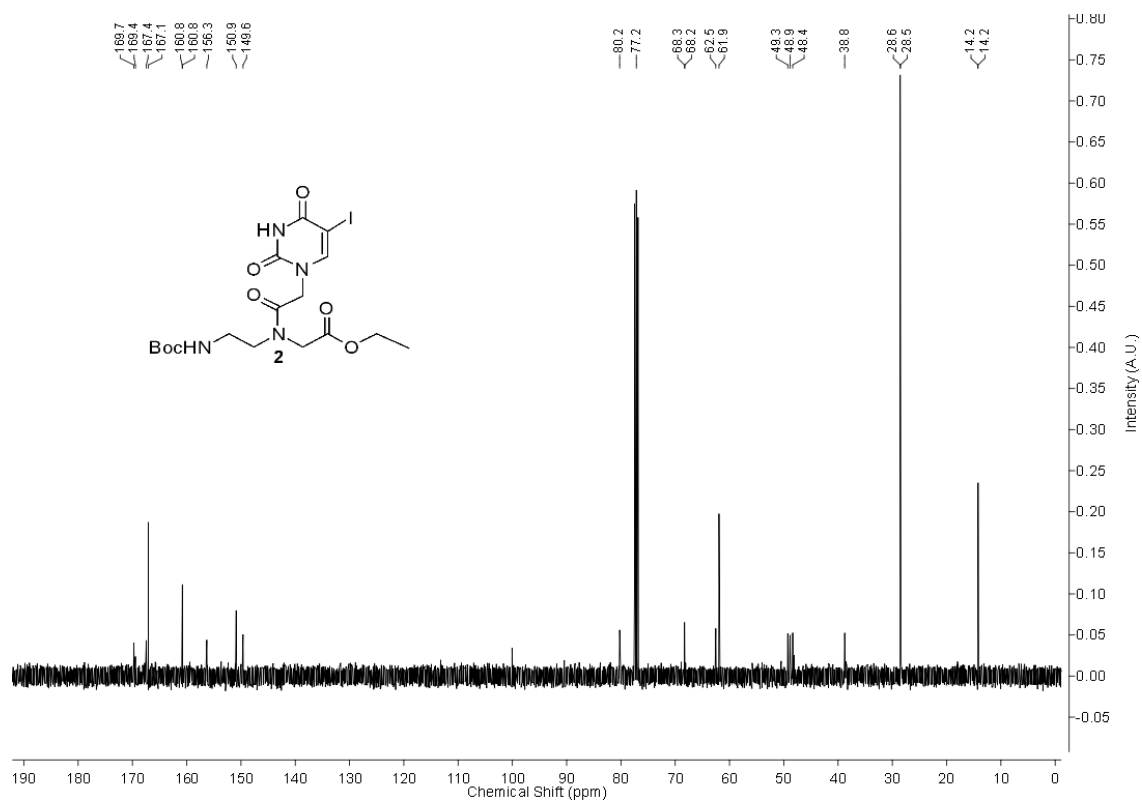

<sup>1</sup>H-NMR of compound **3** in *d*<sub>6</sub>-DMSO

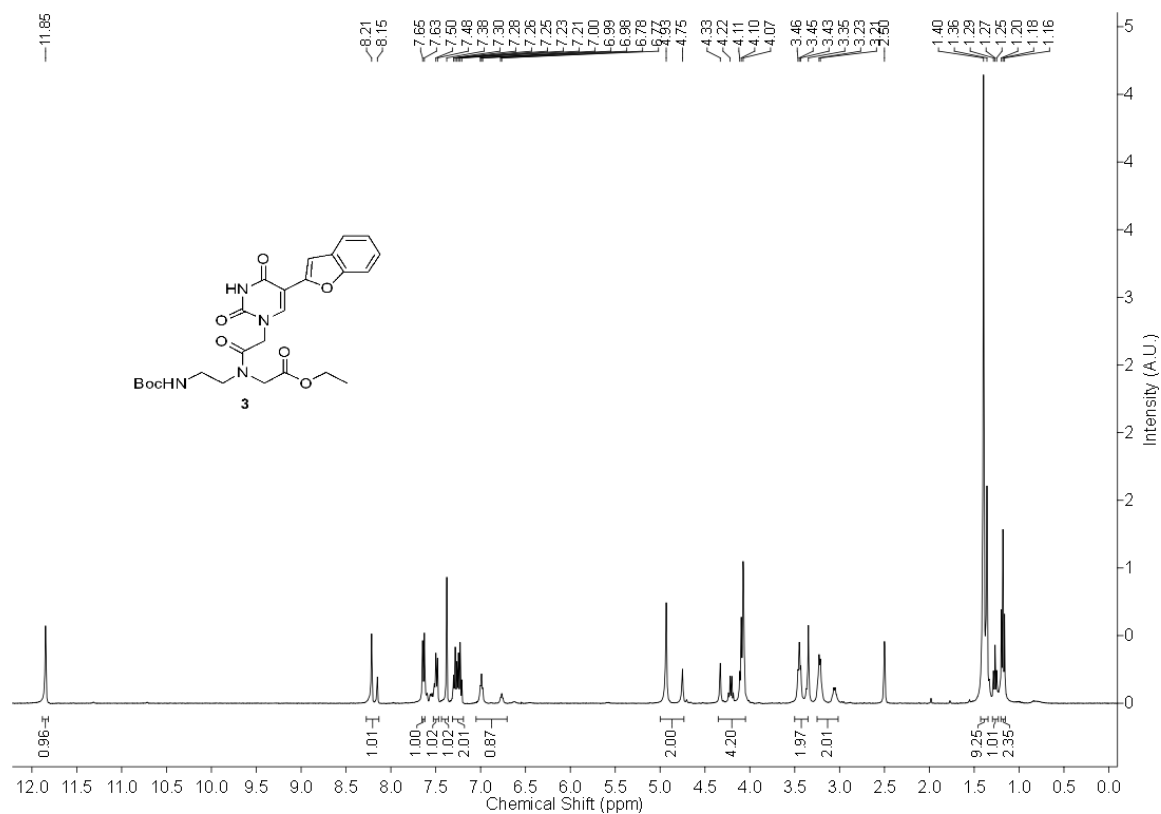

<sup>13</sup>C-NMR of compound **3** in *d*<sub>6</sub>-DMSO

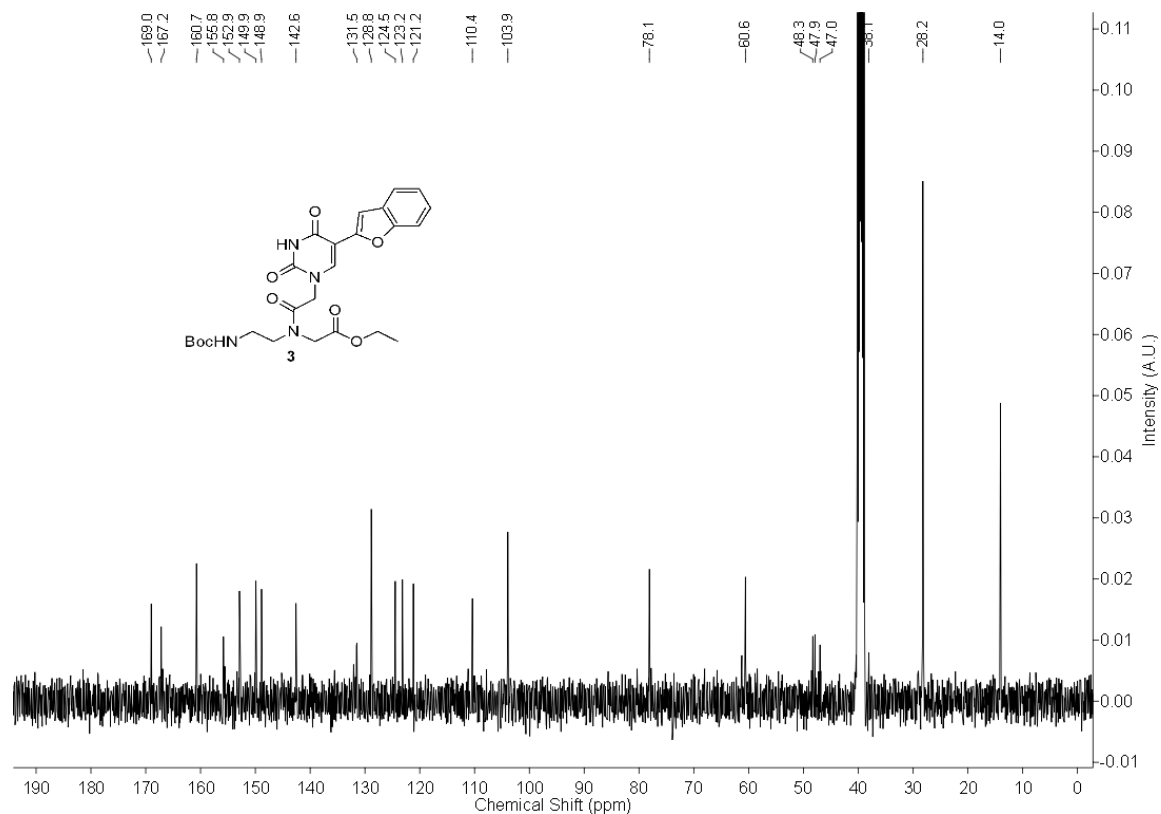

<sup>1</sup>H-NMR of compound **4** in *d*<sub>6</sub>-DMSO

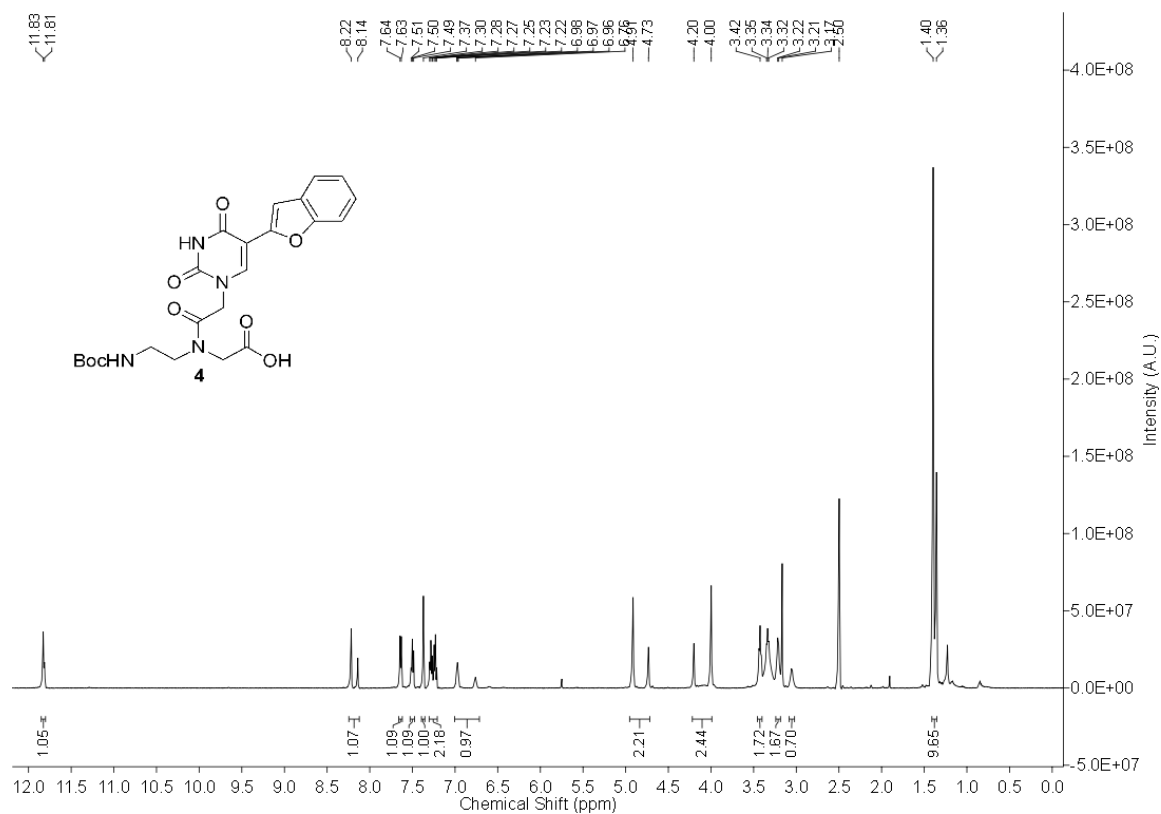

<sup>13</sup>C-NMR of compound **4** in *d*<sub>6</sub>-DMSO

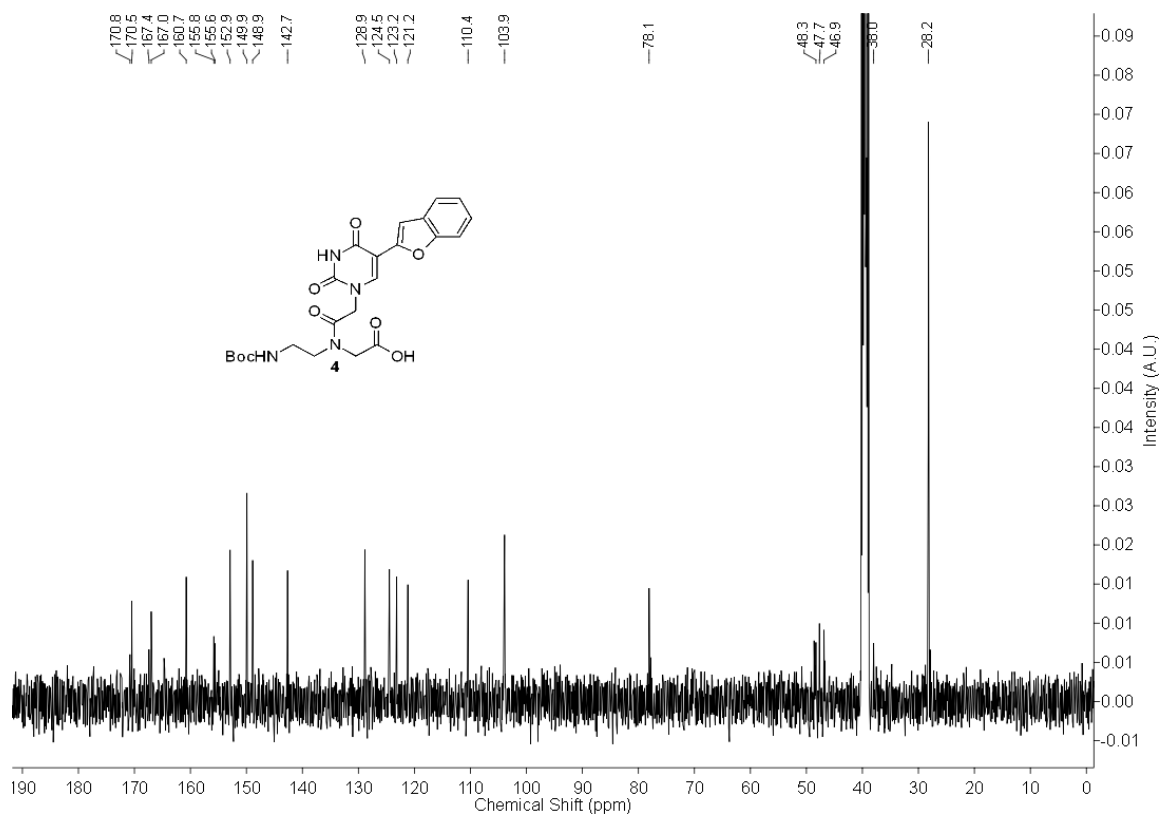

$^1\text{H}$ -NMR of compound **5** in  $d_6$ -DMSO

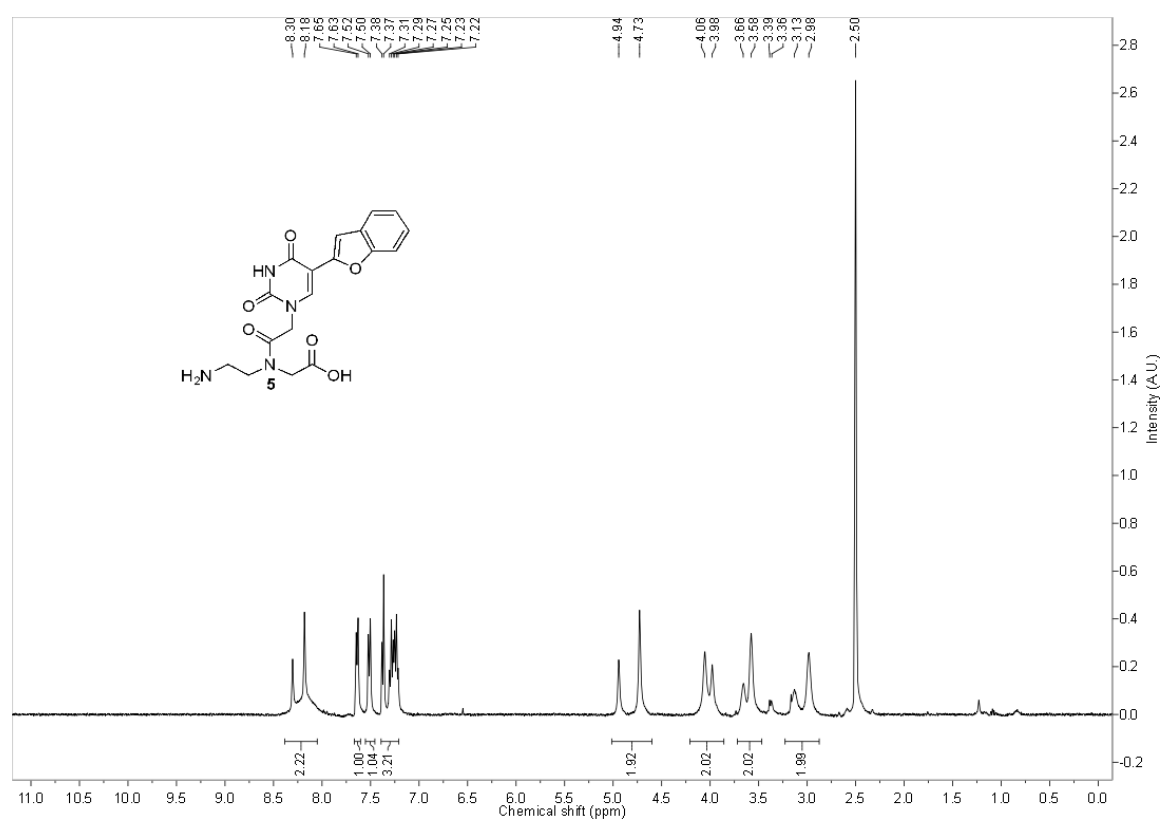

$^{13}\text{C}$ -NMR of compound **5** in  $d_6$ -DMSO

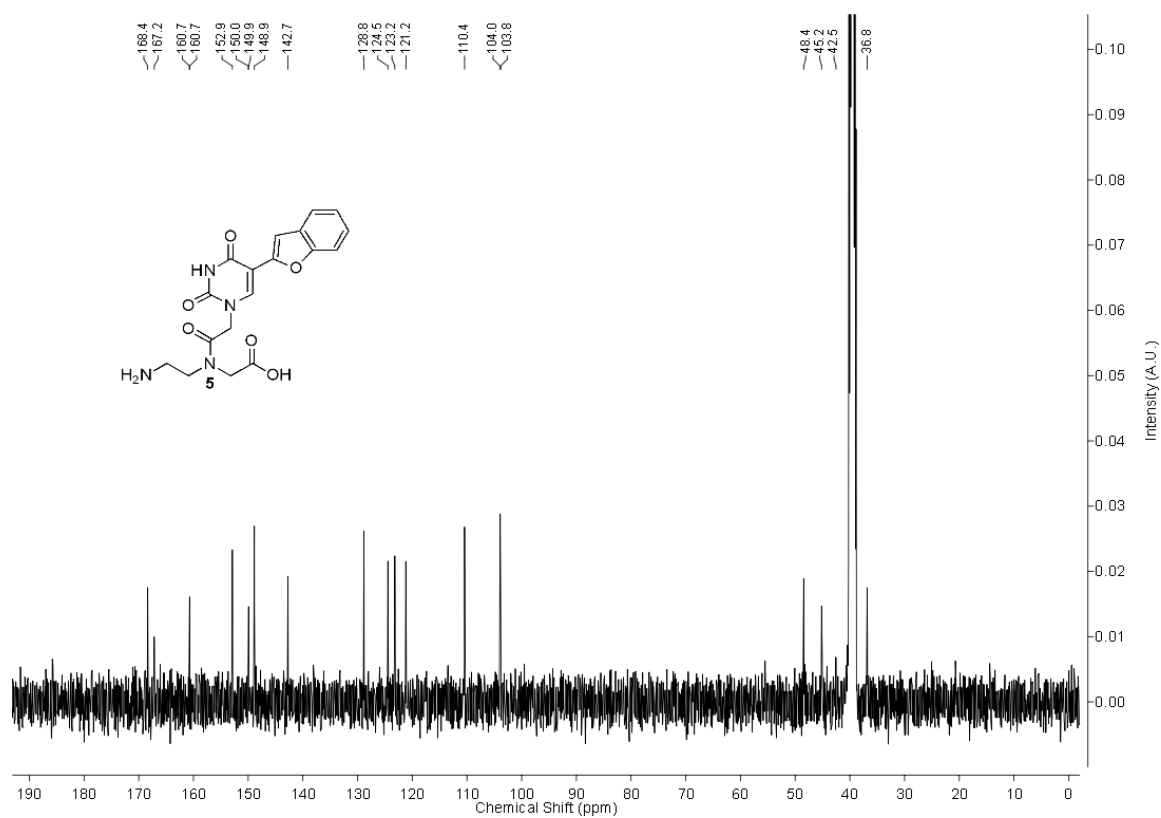

## 6. References

- S1. Z. Luo, Y. Lu, L. A. Somers and A. T. C. Johnson, *J. Am. Chem. Soc.*, 2009, **131**, 898–899.
- S2. (a) C.-H. Lu, H.-H. Yang, C.-L. Zhu, X. Chen and G.-N. Chen, *Angew. Chem. Int. Ed.*, 2009, **48**, 4785–4787; (b) P.-J. J. Huang and J. Liu, *Anal. Chem.*, 2012, **84**, 4192–4198; (c) S. Guo, D. Du, L. Tang, Y. Ning, Q. Yao and G.-J. Zhang, *Analyst*, 2013, **138**, 3216–3220.
